# Supplementary material for: Abyssal plain faunal carbon flows remain depressed 26 years after a simulated deep-sea mining disturbance
Source: Copernicus journal article supplement (doi:10.5194/bg-15-4131-2018), 2018-07-06
Supplement: Supplementary file 1 [file bg-15-4131-2018-supplement.zip]

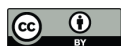

## *Supplement of*

# **Abyssal plain faunal carbon flows remain depressed 26 years after a simulated deep-sea mining disturbance**

**Tanja Stratmann et al.**

*Correspondence to:* Tanja Stratmann ([tanja.stratmann@nioz.nl](mailto:tanja.stratmann@nioz.nl))

- [bg-15-4131-2018-supplement-title-page.pdf](#)
- [Supplement 1.docx](#)
- [Supplement 2.docx](#)
- [Supplement 3.docx](#)
- [Supplement 4.xlsx](#)

The copyright of individual parts of the supplement might differ from the CC BY 4.0 License.
